# Supplementary material
Source: PubMed Central journal article supplement (PMC10681087)
Supplement: i2331-348X-28-7-603_s01.pdf [file i2331-348X-28-7-603_s01.pdf]

| <b>Supplemental Table. Model Covariates and SEs</b> |       |       |       |       |       |      |
|-----------------------------------------------------|-------|-------|-------|-------|-------|------|
| <b>Ternant<sup>10</sup></b>                         |       |       |       |       |       |      |
| Parameter                                           | $k_a$ | CL    | ADAAE | $k_a$ | CL/F  | V/F  |
| Value                                               | 0.2   | 0.409 | 45.8  | 0.15  | 0.42  | 13.5 |
| Units                                               | Fixed | L/day | L/day | Fixed | L/day | L    |
| Uncertainty (%)                                     | None  | 6     | 9     | None  | N/A   | N/A  |

*CL, clearance; CL/F, clearance; DAAE, adalimumab antibodies effect;  $k_a$ , first-order absorption rate constant; V, volume of distribution; V/F, volume of distributions; N/A, not applicable*
